# Supplementary material for: Synthesis of Fe-TiO2 and Cu-TiO2 Based Materials by Olive Leaves Biotemplating—Application to Hydrogen Production from Glycerol Photoreforming
Source: MDPI journal article supplement (doi:10.3390/nano13040664), 2023-02-08
Supplement: s1 [file s1]

## Supporting information

### Fe-TiO<sub>2</sub> and Cu-TiO<sub>2</sub> based materials from olive leaves biotemplating. Synthesis and application to hydrogen production from glycerol photoreforming.

Juan Martín-Gómez<sup>a,\*</sup>, Susana Reca-Expósito<sup>a</sup>, Francisco J. López-Tenllado, Jesús Hidalgo-Carrillo<sup>a</sup>, Alberto Marinas<sup>a</sup>, Francisco J. Urbano<sup>a</sup>

<sup>a</sup> Departamento de Química Orgánica, Instituto Químico para la Energía y el Medioambiente (IQUEMA), Universidad de Córdoba, E-14071 Córdoba, Spain

\*Corresponding author: Juan Martín-Gómez (q92magoj@uco.es)

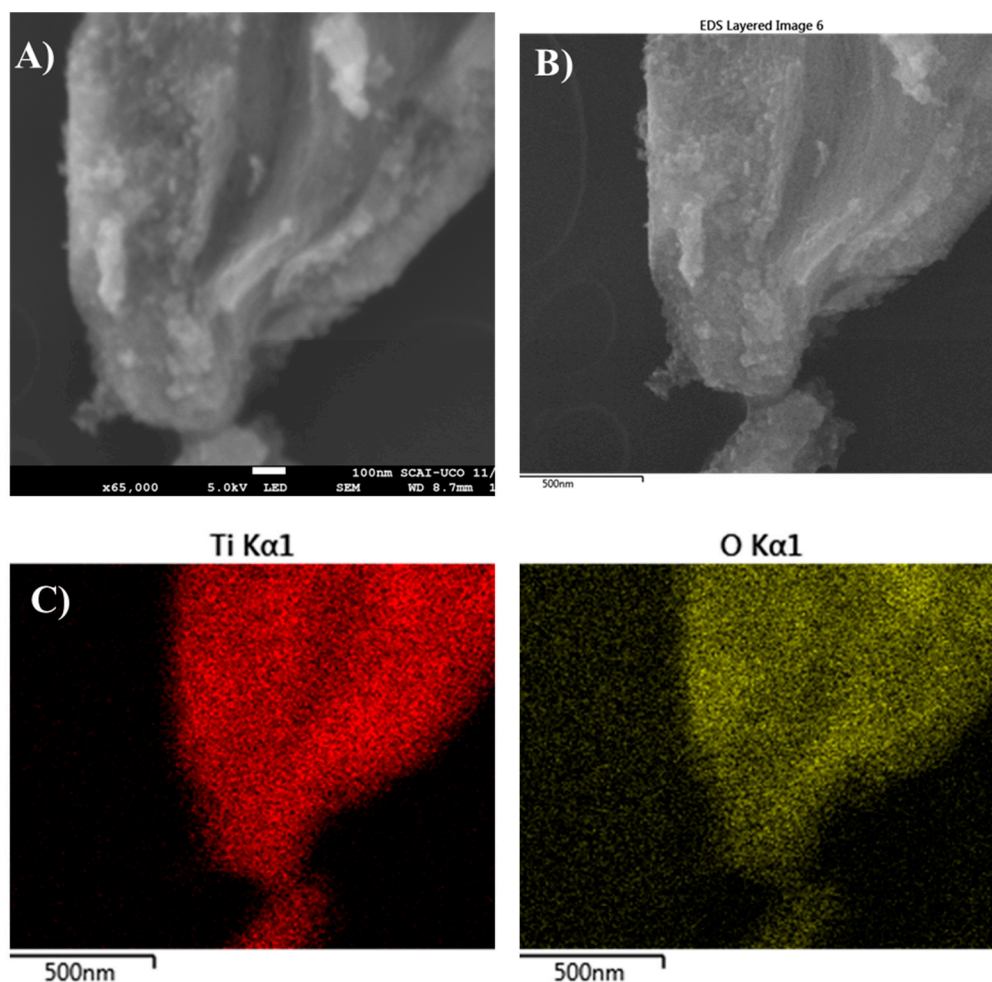

**Figure S1.** (A) Secondary electron detector (SEM), (B) backscattered electron (BSE) and (C) Ti and O energy-dispersive X-ray spectroscopy (EDX) micrographs of AOL.

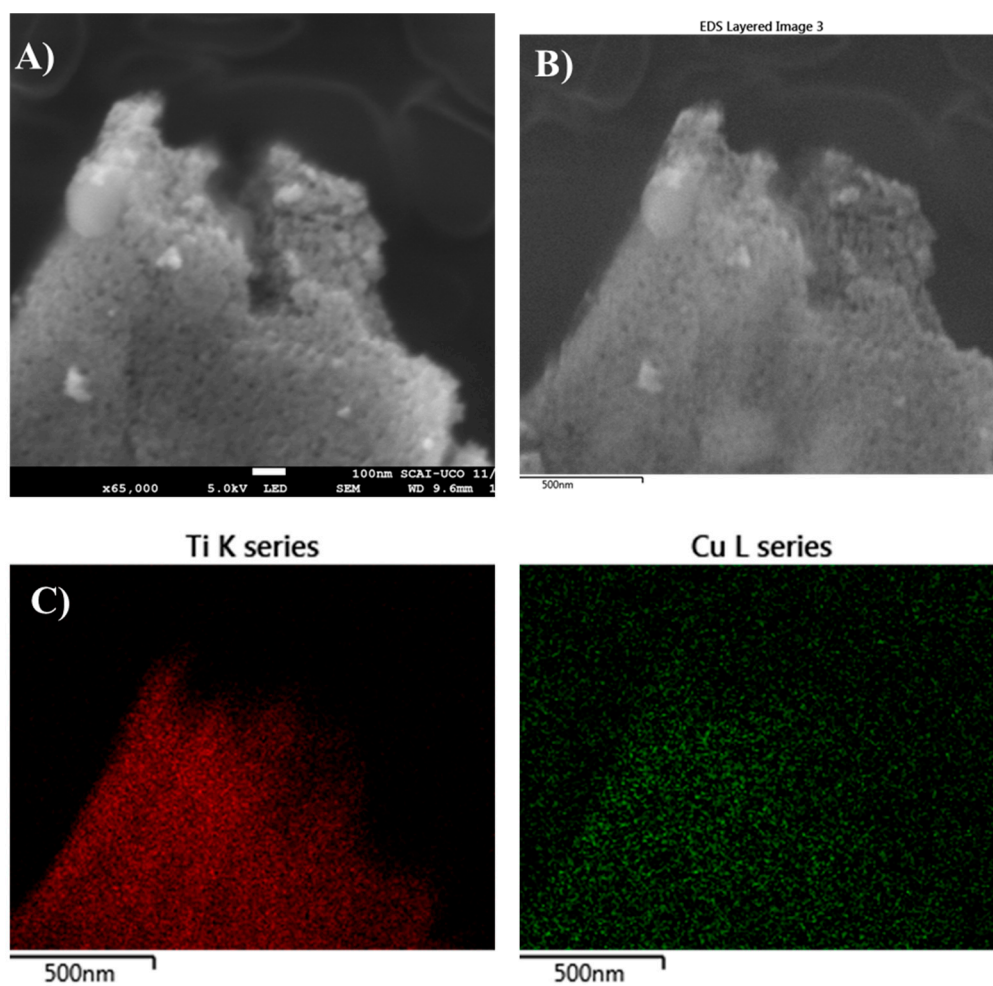

**Figure S2.** (A) Secondary electron detector (SEM), (B) backscattered electron (BSE) and (C) Ti and Cu energy-dispersive X-ray spectroscopy (EDX) micrographs of Cu-AOL.

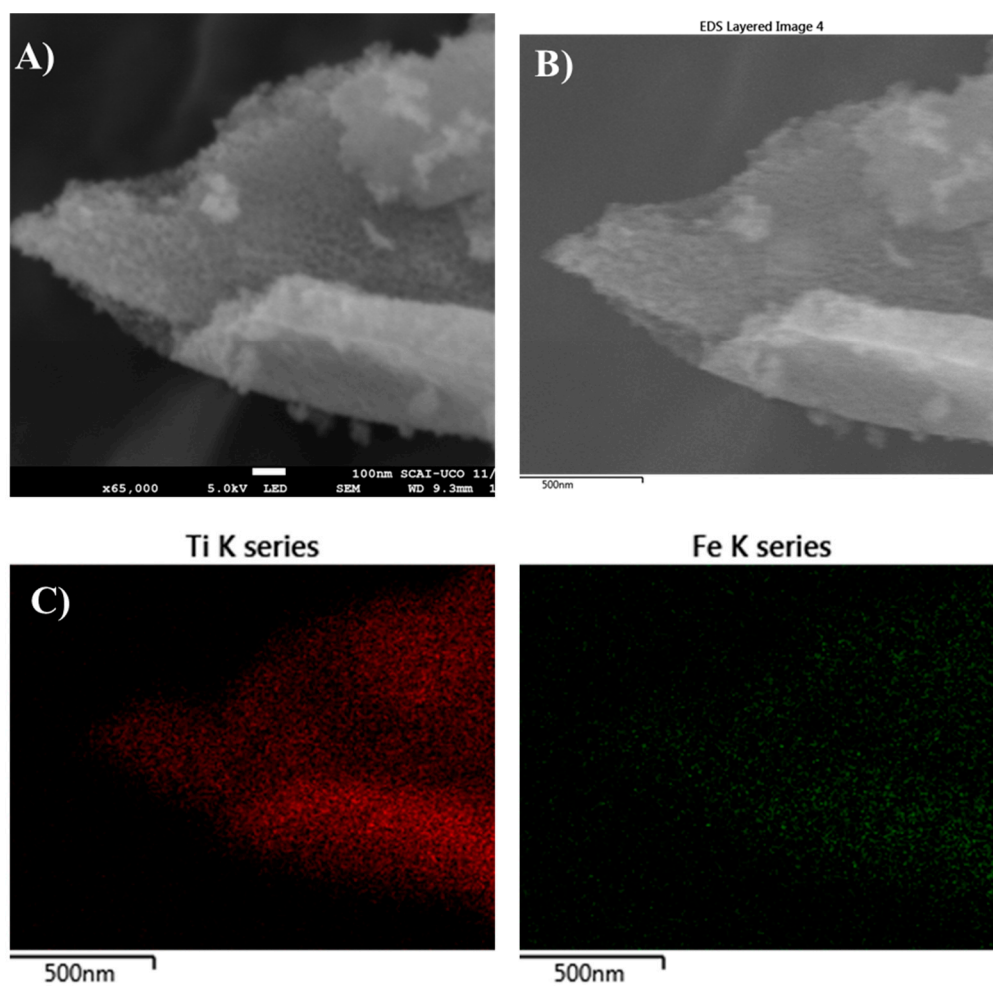

**Figure S3.** (A) Secondary electron detector (SEM), (B) backscattered electron (BSE) and (C) Ti and Fe energy-dispersive X-ray spectroscopy (EDX) micrographs of Fe-AOL.

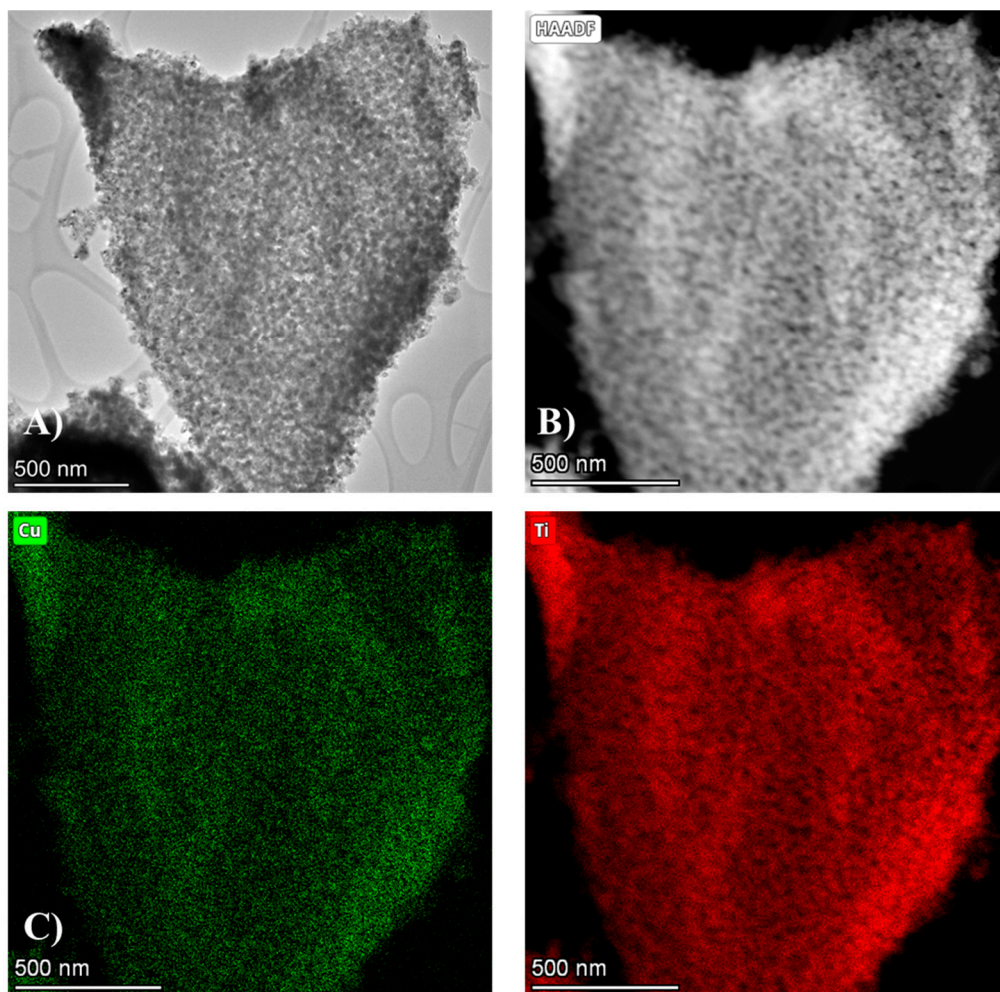

**Figure S4.** (A) Transmission Electron Microscopy (TEM), (B) Scanning Transmission Electron Microscopy (STEM) and (C) Cu and Ti energy-dispersive X-ray spectroscopy (EDX) micrographs of Cu-AOL.

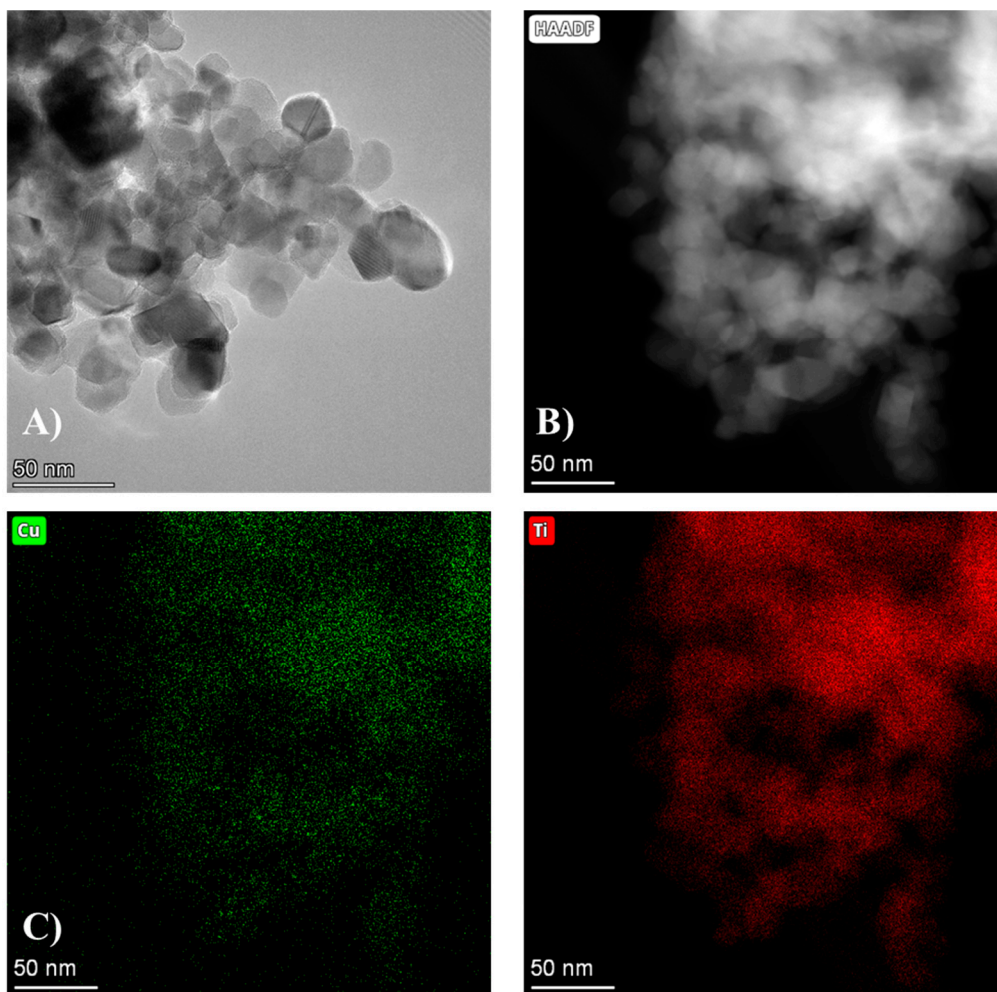

**Figure S5.** (A) Transmission Electron Microscopy (TEM), (B) Scanning Transmission Electron Microscopy (STEM) and (C) Cu and Ti energy-dispersive X-ray spectroscopy (EDX) micrographs of Cu-AOL.



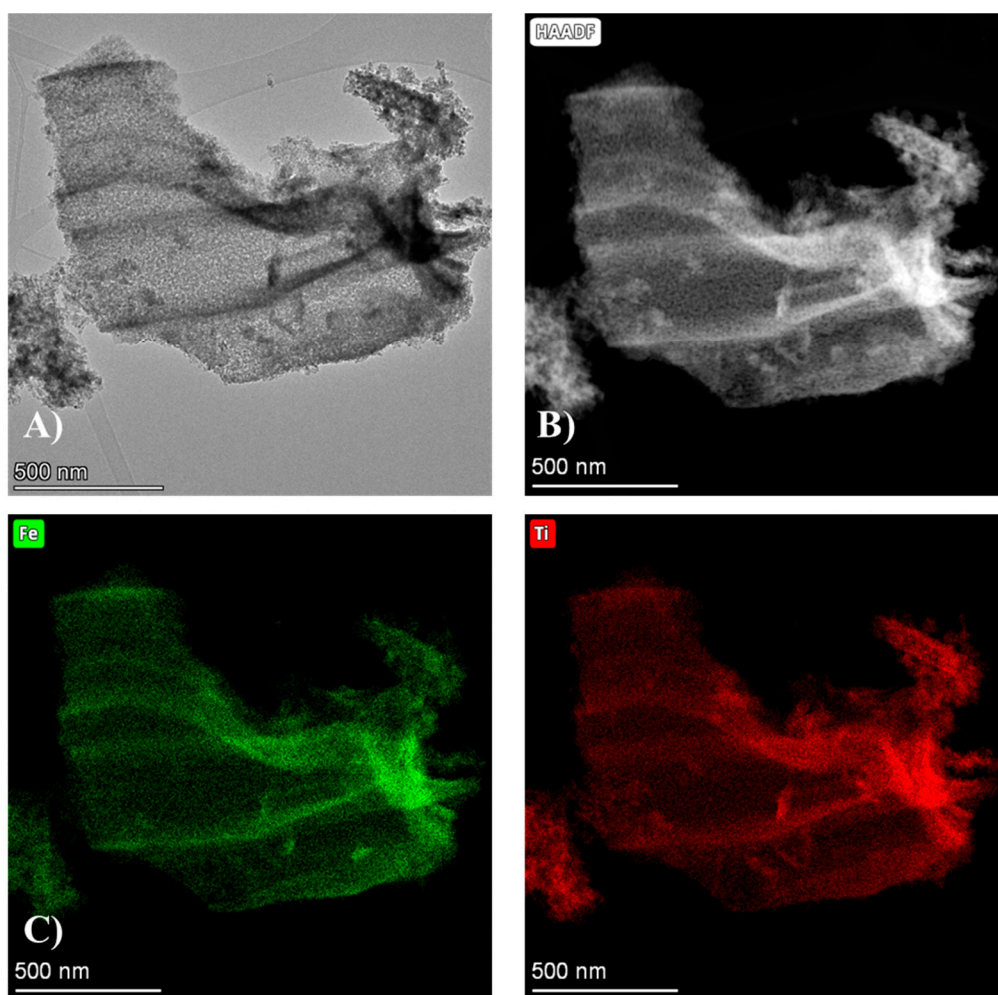

**Figure S6.** (A) Transmission Electron Microscopy (TEM), (B) Scanning Transmission Electron Microscopy (STEM) and (C) Cu and Ti energy-dispersive X-ray spectroscopy (EDX) micrographs of Fe-AOL.

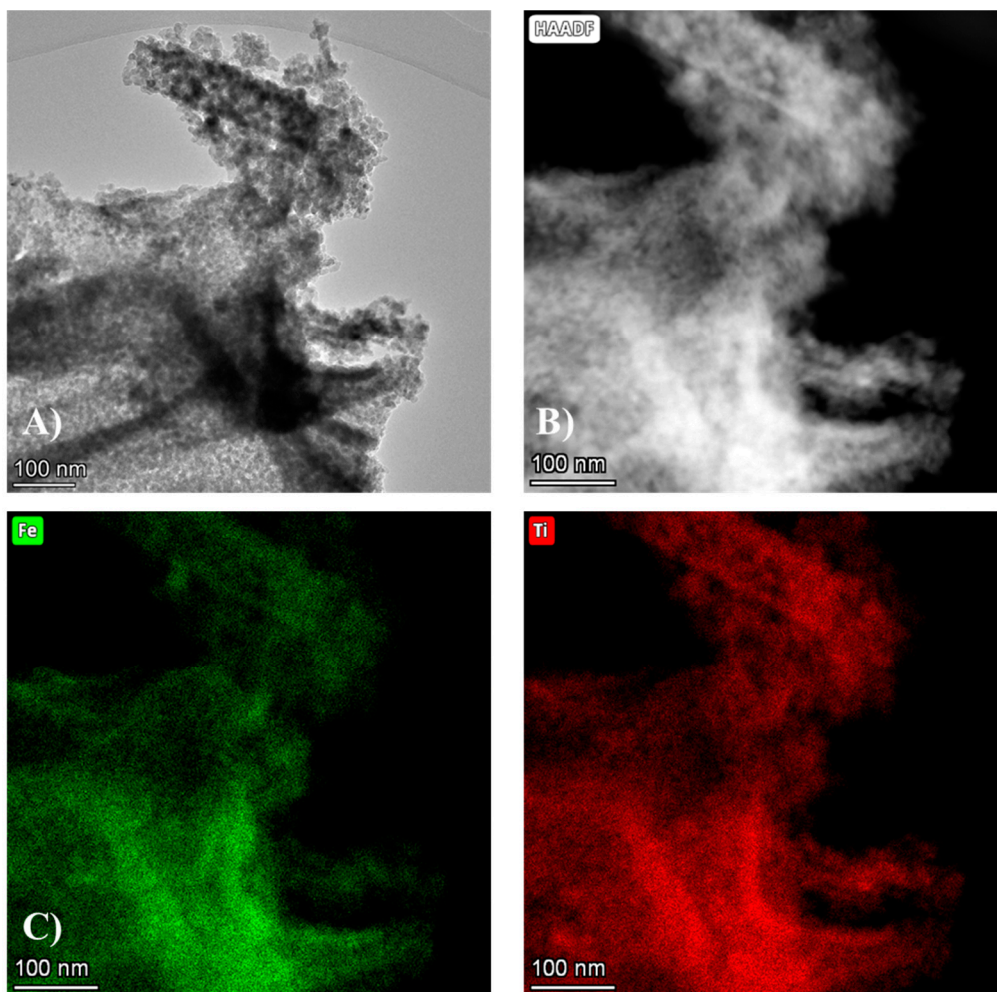

**Figure S7.** (A) Transmission Electron Microscopy (TEM), (B) Scanning Transmission Electron Microscopy (STEM) and (C) Cu and Ti energy-dispersive X-ray spectroscopy (EDX) micrographs of Fe-AOL.

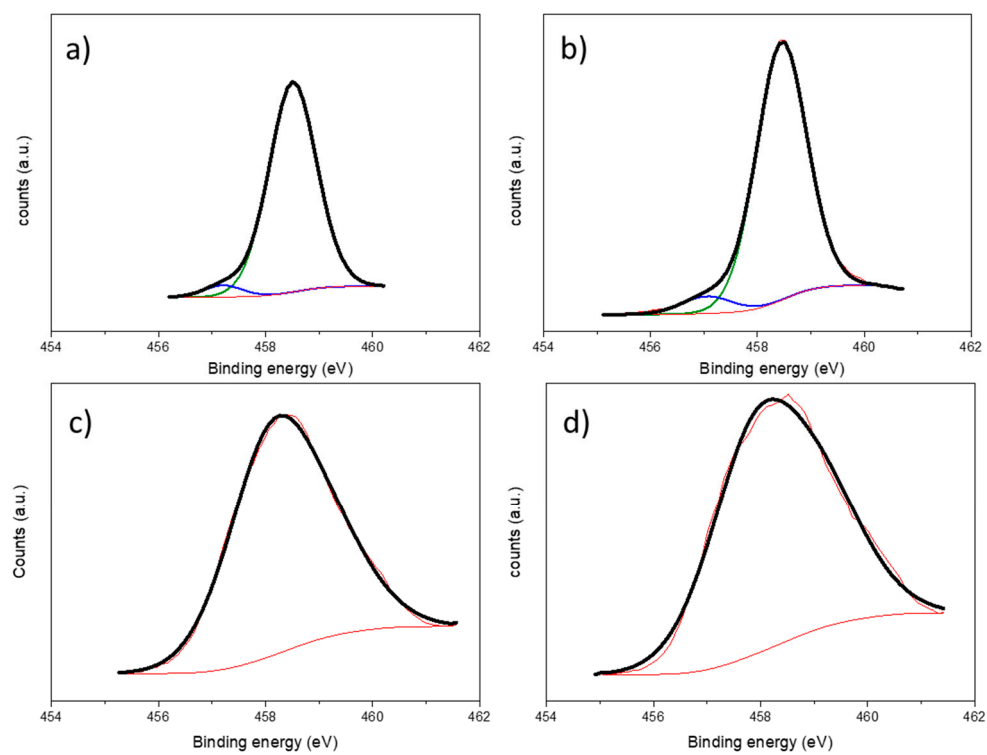

**Figure S8.** XPS spectrum and deconvolution of Ti ( $2p_{3/2}$ ) of (a) Evonik P25, (b) AOL, (c) Fe-AOL and (d) Cu-AOL.



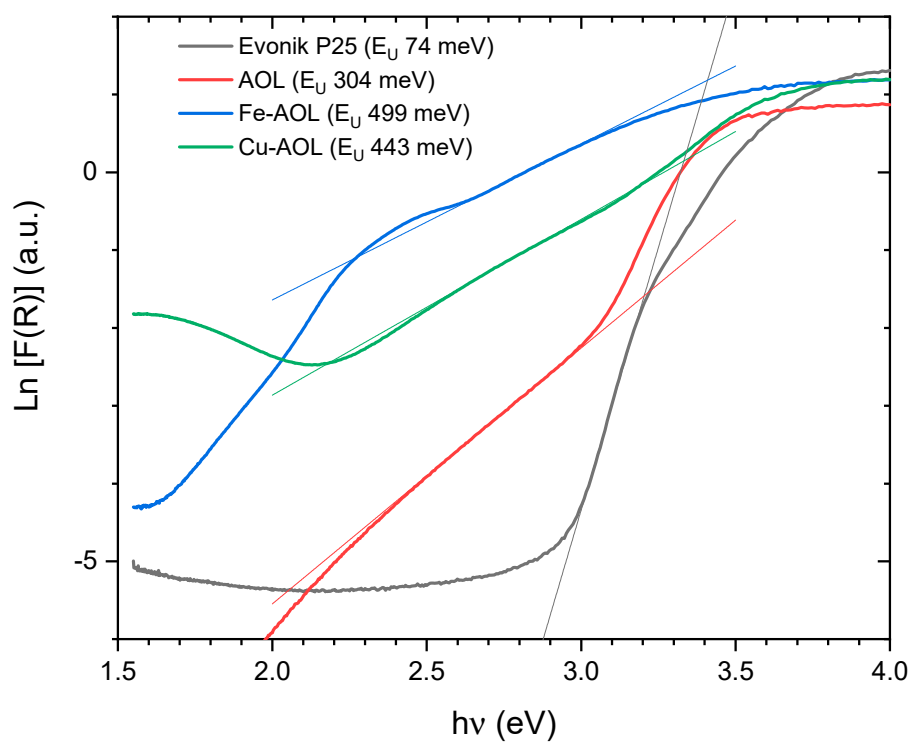

**Figure S9.** Urbach Energy (EU) obtained for the catalysts synthesized in this work. Evonik P25 was included as reference. The Urbach energy is obtained from the inverse of the slope of the  $\ln F(R)$  vs Energy plot.
